# Supplementary material
Source: PubMed Central journal article supplement (PMC7259679)
Supplement: NIHMS1582442-supplement-Supplemental_tables.pdf [file NIHMS1582442-supplement-Supplemental_tables.pdf]

**Supplemental Information**

**Astrocytic *trans*-Differentiation Completes**

**a Multicellular Paracrine Feedback Loop**

**Required for Medulloblastoma Tumor Growth**

**Maojin Yao, P. Britten Ventura, Ying Jiang, Fausto J. Rodriguez, Lixin Wang, Justin S.A. Perry, Yibo Yang, Kelsey Wahl, Rowena B. Crittenden, Mariko L. Bennett, Lin Qi, Cong-Cong Gong, Xiao-Nan Li, Ben A. Barres, Timothy P. Bender, Kodi S. Ravichandran, Kevin A. Janes, Charles G. Eberhart, and Hui Zong**

**Supplemental Table 1. Related to STAR Methods section “EXPERIMENTAL MODEL AND SUBJECT DETAILS, Mice”, and to the first section in “RESULTS, Establishment of MADM-based and other genetic models for medulloblastoma”. Medulloblastoma models used in this paper.**

| <b>Model#</b> | <b>Genotype</b>                                                                                         | <b>Genetic components and their roles</b>                                                                                                                                                                                                                                                                                                                                                          | <b>Uniqueness of the model and its usage in this paper</b>                                                                                                                                                                                                                                                                                                                                                         |
|---------------|---------------------------------------------------------------------------------------------------------|----------------------------------------------------------------------------------------------------------------------------------------------------------------------------------------------------------------------------------------------------------------------------------------------------------------------------------------------------------------------------------------------------|--------------------------------------------------------------------------------------------------------------------------------------------------------------------------------------------------------------------------------------------------------------------------------------------------------------------------------------------------------------------------------------------------------------------|
| <b>A</b>      | <b>Ptch1 KO/wildtype;</b><br><b>MADM-p53KO;</b><br><b>Math1-Cre</b>                                     | <b>Ptch1 KO:</b> Driver mutation for Shh-subtype medulloblastoma<br><b>MADM-p53KO:</b> Increase the tumor penetrance to 100% upon Cre-mediated knockout<br><b>Math1-Cre:</b> Induce inter-chromosomal recombination to generate sporadic p53-null GFP+ GNPs                                                                                                                                        | This model enables single-cell resolution analysis of the entire course of tumorigenesis, and was used in Figures 1E-R, 2B, and Supplemental Figures 1F, 2A.                                                                                                                                                                                                                                                       |
| <b>B</b>      | <b>Ptch1 KO/wildtype;</b><br><b>p53flox/p53flox;</b><br><b>Math1-Cre;</b><br><b>ROSA26-LSL-tdTomato</b> | <b>Ptch1 KO:</b> Driver mutation for Shh-subtype medulloblastoma<br><b>p53flox/p53flox:</b> Increase the tumor penetrance to 100% upon Cre-mediated knockout<br><b>Math1-Cre:</b> Induce loxP-mediated recombination to knockout p53 and turn on Cre reporter tdTomato in all GNPs<br><b>ROSA26-LSL-tdTomato:</b> Cre reporter used for lineage tracing of all cells derived from Math1-Cre+ cells | This model enables lineage tracing from tumor GNPs even after they differentiate into other cells types, and was used in Figure 7J-K, Supplemental Figures 1G, 2E-H, 3E-G, 7G-H.                                                                                                                                                                                                                                   |
| <b>C</b>      | <b>Ptch1 KO/wildtype;</b><br><b>p53flox/p53flox;</b><br><b>Math1-Cre; Math1-GFP</b>                     | <b>Ptch1 KO:</b> Driver mutation for Shh-subtype medulloblastoma<br><b>p53flox/p53flox:</b> Increase the tumor penetrance to 100% upon Cre-mediated knockout<br><b>Math1-Cre:</b> Induce loxP-mediated recombination to knockout p53 in all GNPs<br><b>Math1-GFP:</b> Transgenic reporter for wildtype and tumor GNPs, which turns off after they differentiate                                    | This model enables one to distinguish GFP+ tumor from GFP- TME cells, and was used in Figures 4F-G, 6J-K, 7C-I, and Supplemental Figures 3A-D, 4A-C, 7C-F.                                                                                                                                                                                                                                                         |
| <b>D</b>      | <b>Ptch1 KO/wildtype;</b><br><b>p53KO/p53KO;</b><br><b>Math1-GFP</b>                                    | <b>Ptch1 KO:</b> Driver mutation for Shh-subtype medulloblastoma<br><b>p53KO/p53KO:</b> Increase the tumor penetrance to 100% in the absence of Cre<br><b>Math1-GFP:</b> Transgenic reporter for wildtype and tumor GNPs, which turns off after they differentiate                                                                                                                                 | This model frees up Cre for other purposes, such as to label TuAstrocytes with GLAST-CreER and Cre reporter in Supplemental Figure 2B-D and Figure 3, to knock out IGF1R after tumor formation with Math1-CreER in Figure 4H-J and Supplemental Figure 4E-I, to knock out IGF1 in TAMs with CSF1R-Cre in Figure 5H-J, and to trace the lineage of TAMs with CX3CR1-CreER in Figure 6A-E and Supplemental Figure 6. |

**Supplemental Table 2. Related to Figure 7. Luminex profiling of cytokines and chemokines.**

Tumor tissues were dissected out based on Math1-GFP expression and lysed in Tissue Extraction Reagent I (Invitrogen) supplemented with protease inhibitors. Normal cerebelli from age-matched mice were processed in the same fashion as control samples. Protein concentration of the lysates was determined by BCA protein quantification method. All lysates were carefully adjusted to 1.5mg/ml with lysis buffer, and 25 $\mu$ l each was applied to mouse 32-plex cytokine/chemokine luminex panel. The absolute quantity of cytokine/chemokine present in cell lysate was expressed as picogram per 10ug of tissue lysate. Four tumors and three normal cerebella were used for this study.

| Gene name      | Normal cerebellum<br>( Means $\pm$ SD, pg/10 $\mu$ g) | Tumor mass<br>( Means $\pm$ SD, pg/10 $\mu$ g) | p value |
|----------------|-------------------------------------------------------|------------------------------------------------|---------|
| G-CSF          | 4.47 $\pm$ 1.10                                       | 6.49 $\pm$ 2.46                                |         |
| GM-CSF         | 14.98 $\pm$ 1.80                                      | 20.02 $\pm$ 3.57                               |         |
| M-CSF          | 4.32 $\pm$ 0.96                                       | 5.21 $\pm$ 1.84                                |         |
| IFN $\gamma$   | 3.13 $\pm$ 0.16                                       | 3.20 $\pm$ 2.0                                 |         |
| IL1a           | 31.04 $\pm$ 7.45                                      | 20.53 $\pm$ 9.28                               |         |
| IL1b           | 92.74 $\pm$ 13.23                                     | 77.68 $\pm$ 58.19                              |         |
| <b>IL2</b>     | <b>90.09<math>\pm</math>4.0</b>                       | <b>13.81<math>\pm</math>8.31</b>               | p<0.001 |
| IL3            | Below detection                                       | Below detection                                |         |
| <b>IL4</b>     | <b>5.97<math>\pm</math>1.37</b>                       | <b>9.66<math>\pm</math>1.49</b>                | p<0.05  |
| IL5            | 1.98 $\pm$ 0.12                                       | 1.83 $\pm$ 0.61                                |         |
| IL6            | 8.76 $\pm$ 2.97                                       | 6.44 $\pm$ 0.54                                |         |
| IL7            | 2.02 $\pm$ 0.86                                       | 1.68 $\pm$ 0.29                                |         |
| <b>IL9</b>     | <b>868.44<math>\pm</math>68.9</b>                     | <b>546.4<math>\pm</math>68.19</b>              | p<0.01  |
| IL10           | 13.47 $\pm$ 0.69                                      | 30.08 $\pm$ 20.36                              |         |
| IL12           | 4.06 $\pm$ 0.32                                       | 4.06 $\pm$ 0.50                                |         |
| IL13           | 635.6 $\pm$ 49.22                                     | 857.7 $\pm$ 571.1                              |         |
| <b>IL15</b>    | <b>60.50<math>\pm</math>12.03</b>                     | <b>33.50<math>\pm</math>7.74</b>               | p<0.05  |
| <b>IL17A</b>   | <b>4.92<math>\pm</math>0.61</b>                       | <b>1.01<math>\pm</math>0.41</b>                | p<0.01  |
| LIF            | Below detection                                       | 1.33 $\pm$ 0.52                                |         |
| LIX            | 61.3 $\pm$ 5.77                                       | 49.74 $\pm$ 44.2                               |         |
| <b>CXCL10</b>  | <b>17.01<math>\pm</math>2.21</b>                      | <b>102.87<math>\pm</math>25.70</b>             | p<0.01  |
| KC             | 15.69 $\pm$ 2.57                                      | 106.60 $\pm$ 128.97                            |         |
| MCP1           | 28.94 $\pm$ 4.97                                      | 39.15 $\pm$ 22.62                              |         |
| <b>MIP-1a</b>  | <b>26.79<math>\pm</math>2.85</b>                      | <b>81.56<math>\pm</math>33.99</b>              | p<0.05  |
| <b>MIP-1b</b>  | <b>62.24<math>\pm</math>15.45</b>                     | <b>24.08<math>\pm</math>4.31</b>               | p<0.05  |
| MIP-2          | 17.21 $\pm$ 0.55                                      | 19.18 $\pm$ 3.30                               |         |
| <b>MIG</b>     | <b>12.40<math>\pm</math>2.94</b>                      | <b>29.11<math>\pm</math>5.66</b>               | p<0.05  |
| RANTES         | 2.45 $\pm$ 0.12                                       | 3.72 $\pm$ 0.96                                |         |
| <b>Eotaxin</b> | <b>8.98<math>\pm</math>1.85</b>                       | <b>88.17<math>\pm</math>38.09</b>              | p<0.05  |
| TNF $\alpha$   | 2.25 $\pm$ 0.25                                       | 2.01 $\pm$ 0.88                                |         |

**Supplemental Table 3. Related to “Key Resources Table, Oligonucleotides section”.**  
**Oligonucleotides used in this paper.** This is a list of oligonucleotides that were used for mouse genotyping, qRT-PCR, and probes for in situ hybridization.

| Mouse genotyping                                                                                                                                                                                                  | Source     | Reference |
|-------------------------------------------------------------------------------------------------------------------------------------------------------------------------------------------------------------------|------------|-----------|
| TG11ML, GT11ML mouse genotyping:<br>Chr11_CS1: 5'-TGGAGGAGGACAAACTGGTCAC-3'<br>Rosa4: 5'-TCAATGGGCGGGGGTCGTT-3'<br>Chr11_CS2: 5'- TTCCCTTTCTGCTTCATCTTGC-3'                                                       | This paper | N/A       |
| IGF1R flox mouse genotyping:<br>10451: 5'-CTTCCCAGCTTGCTACTCTAGG-3'<br>10452: 5'-CAGGCTTGCAATGAGACATGGG-3'<br>IGF1R-rec-F: 5'-TGAGACGTAGCGAGATTGCTGTA-3'                                                          | This paper | N/A       |
| IGF1 flox mouse genotyping:<br>10663 5'-CACTAAGGAGTCTGTATTTGGACC-3'<br>10664 5'-AAACCACACTGCTCGACATTG-3'<br>11736 5'-GGCAAATGGAAATCCTATGTCT-3'                                                                    | This paper | N/A       |
| CSF1R-iCre mouse genotyping:<br>Cre-F: 5'-CACCCCTGTTACGTATAGCCG-3'<br>Cre-R: 5'-GAGTCATCCTTAGCGCCGTA-3'                                                                                                           | This paper | N/A       |
| CX3CR1-CreER <sup>12</sup> mouse genotyping:<br>Cre-F: 5'-CACCCCTGTTACGTATAGCCG-3'<br>Cre-R: 5'-GAGTCATCCTTAGCGCCGTA-3'                                                                                           | This paper | N/A       |
| Ptch1-KO mouse genotyping:<br>Ptc-Neo-F3: 5'-TGGGGTGGGATTAGATAAATGCC-3'<br>Ptc-R3: 5'-TGTCTGTGTGTGCTCCTGAATCAC-3'<br>Ptc-WT3: 5'-CTGCGGCAAGTTTTTGGTTG-3'<br>Ptc-WT4: 5'-AGGGCTTCTCGTTGGCTACAAG-3'                 | This paper | N/A       |
| p53-KO mouse genotyping:<br>neo tail: 5'-ACCGCTATCAGGACATAGCGTTGG-3'<br>p53 TJW5: 5'-CACAGCGTGGTGGTACCTTATG-3'<br>p53 TJW3: 5'- GGTATACTCAGAGCCGGCCTG-3'                                                          | This paper | N/A       |
| p53-flox mouse genotyping:<br>T008: 5'-CACAAAAACAGGTTAAACCCAG-3'<br>T009: 5'-AGCACATAGGAGGCAGAGAC-3'                                                                                                              | This paper | N/A       |
| Math1-Cre mouse genotyping:<br>Cre-F: 5'-CACCCCTGTTACGTATAGCCG-3'<br>Cre-R: 5'-GAGTCATCCTTAGCGCCGTA-3'                                                                                                            | This paper | N/A       |
| Math1-CreER <sup>12</sup> mouse genotyping:<br>Cre-F: 5'-CACCCCTGTTACGTATAGCCG-3'<br>Cre-R: 5'-GAGTCATCCTTAGCGCCGTA-3'                                                                                            | This paper | N/A       |
| Math1-GFP mouse genotyping:<br>FACS G5': 5'-CTTCAAGTCCGCCATGCCCCGA-3'<br>GFP2-Hermie: 5'-TCCAGCAGGACCATGTGATCGC-3'<br>IMR0015 (IC): 5'-CAAATGTTGCTTGTCTGGTG-3'<br>IMR0016 (IC): 5'-GTCAGTCGAGTGCACAGTTT-3'        | This paper | N/A       |
| IL4-GFP reporter mouse genotyping:<br>FACS G5': 5'-CTTCAAGTCCGCCATGCCCCGA-3'<br>GFP2-Hermie: 5'-TCCAGCAGGACCATGTGATCGC-3'<br>IMR0015 (IC): 5'-CAAATGTTGCTTGTCTGGTG-3'<br>IMR0016 (IC): 5'-GTCAGTCGAGTGCACAGTTT-3' | This paper | N/A       |

|                                                                                                                                                                                                                      |            |     |
|----------------------------------------------------------------------------------------------------------------------------------------------------------------------------------------------------------------------|------------|-----|
| IL4-KO mouse genotyping:<br>oIMR0077 5'-GCACAGAGCTATTGATGG -3'<br>GTCIMR0078 5'-GCTGTGAGGACGTTTGGC-3'<br>oIMR0079 5'-TCAGGACATAGCGTTGGC-3'                                                                           | This paper | N/A |
| Rosa26-LSL-tdTomato mouse genotyping:<br>oIMR9020 5'-AAGGGAGCTGCAGTGGAGTA-3'<br>oIMR9021 5'-CCGAAAATCTGTGGGAAGTC-3'<br>oIMR9103 5'-GGCATTAAAGCAGCGTATCC-3'<br>oIMR9105 5'-CTGTTCCTGTACGGCATGG-3'                     | This paper | N/A |
| Aldh1L1-GFP reporter mouse genotyping:<br>FACS G5': 5'-CTTCAAGTCCGCCATGCCCGA-3'<br>GFP2-Hermie: 5'-TCCAGCAGGACCATGTGATCGC-3'<br>IMR0015 (IC): 5'-CAAATGTTGCTTGTCTGGTG-3'<br>IMR0016 (IC): 5'-GTCAGTCGAGTGCACAGTTT-3' | This paper | N/A |
| <b>qRT-PCR</b>                                                                                                                                                                                                       |            |     |
| Mouse IGF1 qPCR Forward:<br>5'-GGCATTGTGGATGAGTGTTG-3'                                                                                                                                                               | This paper | N/A |
| Mouse IGF1 qPCR Reverse:<br>5'-TCTCCTTTGCAGCTTCGTTT-3'                                                                                                                                                               | This paper | N/A |
| Mouse CSF1R qPCR Forward:<br>5'-TCCACCGGGACGTAGCA-3'                                                                                                                                                                 | This paper | N/A |
| Mouse CSF1R qPCR Reverse:<br>5'-CCAGTCCAAAGTCCCCAATCT-3'                                                                                                                                                             | This paper | N/A |
| mouse GAPDH qPCR Forward:<br>5'-CAGGTTGTCTCCTGCGACTT-3'                                                                                                                                                              | This paper | N/A |
| mouse GAPDH qPCR Reverse:<br>5'-ATGTAGGCCATGAGGTCCAC-3'                                                                                                                                                              | This paper | N/A |
| mouse PDGFA qPCR Forward:<br>5'-GAGATACCCCGGGAGTTGAT-3'                                                                                                                                                              | This paper | N/A |
| mouse PDGFA qPCR Reverse:<br>5'-TCTTGCAAACCTGCAGGAATG-3'                                                                                                                                                             | This paper | N/A |
| mouse PDGFB qPCR Forward:<br>5'-GATCTCTCGGAACCTCATCG-3'                                                                                                                                                              | This paper | N/A |
| mouse PDGFB qPCR Reverse:<br>5'-GGCTTCTTTCGCACAATCTC-3'                                                                                                                                                              | This paper | N/A |
| mouse HGF qPCR Forward:<br>5'-TTCCCAGCTGGTCTATGGTC-3'                                                                                                                                                                | This paper | N/A |
| mouse HGF qPCR Reverse:<br>5'-TGGTGCTGACTGCATTTCTC-3'                                                                                                                                                                | This paper | N/A |
| Mouse FGF2 qPCR Forward:<br>5'-AGCGGCTCTACTGCAAGAAC-3'                                                                                                                                                               | This paper | N/A |
| Mouse FGF2 qPCR Reverse:<br>5'-GCCGTCCATCTTCCTTCATA-3'                                                                                                                                                               | This paper | N/A |
| mouse EGF qPCR Forward:<br>5'-CCCAGGCAACGTATCAAAGT-3'                                                                                                                                                                | This paper | N/A |
| mouse EGF qPCR Reverse:<br>5'-GGTCATACCCAGGAAAGCAA-3'                                                                                                                                                                | This paper | N/A |
| mouse NT3 qPCR Forward:<br>5'-GATCCAGGCGGATATCTTGA-3'                                                                                                                                                                | This paper | N/A |
| mouse NT3 qPCR Reverse:<br>5'-AGCGTCTCTGTTGCCGTAGT-3'                                                                                                                                                                | This paper | N/A |

|                                                              |               |                                                                     |
|--------------------------------------------------------------|---------------|---------------------------------------------------------------------|
| mouse KitL qPCR Forward:<br>5'-TGGTGGCAAATCTTCCAAAT-3'       | This paper    | N/A                                                                 |
| mouse KitL qPCR Reverse:<br>5'-TTCTTCGGTGCCTTTTCTTC-3'       | This paper    | N/A                                                                 |
| mouse Math1 qPCR Forward:<br>5'-GCCAATGCAGAGCAACTTTT-3'      | This paper    | N/A                                                                 |
| mouse Math1 qPCR Reverse:<br>5'-AATGGGTCCAAATACGCAAT-3'      | This paper    | N/A                                                                 |
| mouse Aldh1L1 qPCR Forward:<br>5'-GCCTTCCAACCTTCTGTTGC-3'    | This paper    | N/A                                                                 |
| mouse Aldh1L1 qPCR Reverse:<br>5'-CGCCACCGAGGGAACTTAAA-3'    | This paper    | N/A                                                                 |
| <b>Probes for in situ hybridization</b>                      |               |                                                                     |
| mouse IGF1 in situ Forward:<br>5'-ACACAAGTAGAGGAAGTGCAGGA-3' | Allen brain   | <a href="http://mouse.brain-map.org">http://mouse.brain-map.org</a> |
| mouse IGF1 in situ Reverse:<br>5'-GCAGCCAAAATTCAGAGAGAA-3'   | Allen brain   | <a href="http://mouse.brain-map.org">http://mouse.brain-map.org</a> |
| mouse IL4 in situ Forward:<br>5'-TCACTGACGGCACAGAGC-3'       | Allen brain   | <a href="http://mouse.brain-map.org">http://mouse.brain-map.org</a> |
| mouse IL4 in situ Reverse:<br>5'-TGCTCTTTAGGCTTTCCAGG-3'     | Allen brain   | <a href="http://mouse.brain-map.org">http://mouse.brain-map.org</a> |
| Arg1-TaqMan Probe                                            | Mm00475988_m1 | N/A                                                                 |
| Chil3-TaqMan Probe                                           | Mm00657889_mH | N/A                                                                 |
| Retnla-TaqMan Probe                                          | Mm00445109_m1 | N/A                                                                 |
| IGF1-TaqMan Probe                                            | Mm00439560_m1 | N/A                                                                 |
| GAPDH-TaqMan Probe                                           | Mm99999915_g1 | N/A                                                                 |
