# Supplementary material
Source: PubMed Central journal article supplement (PMC7259679)

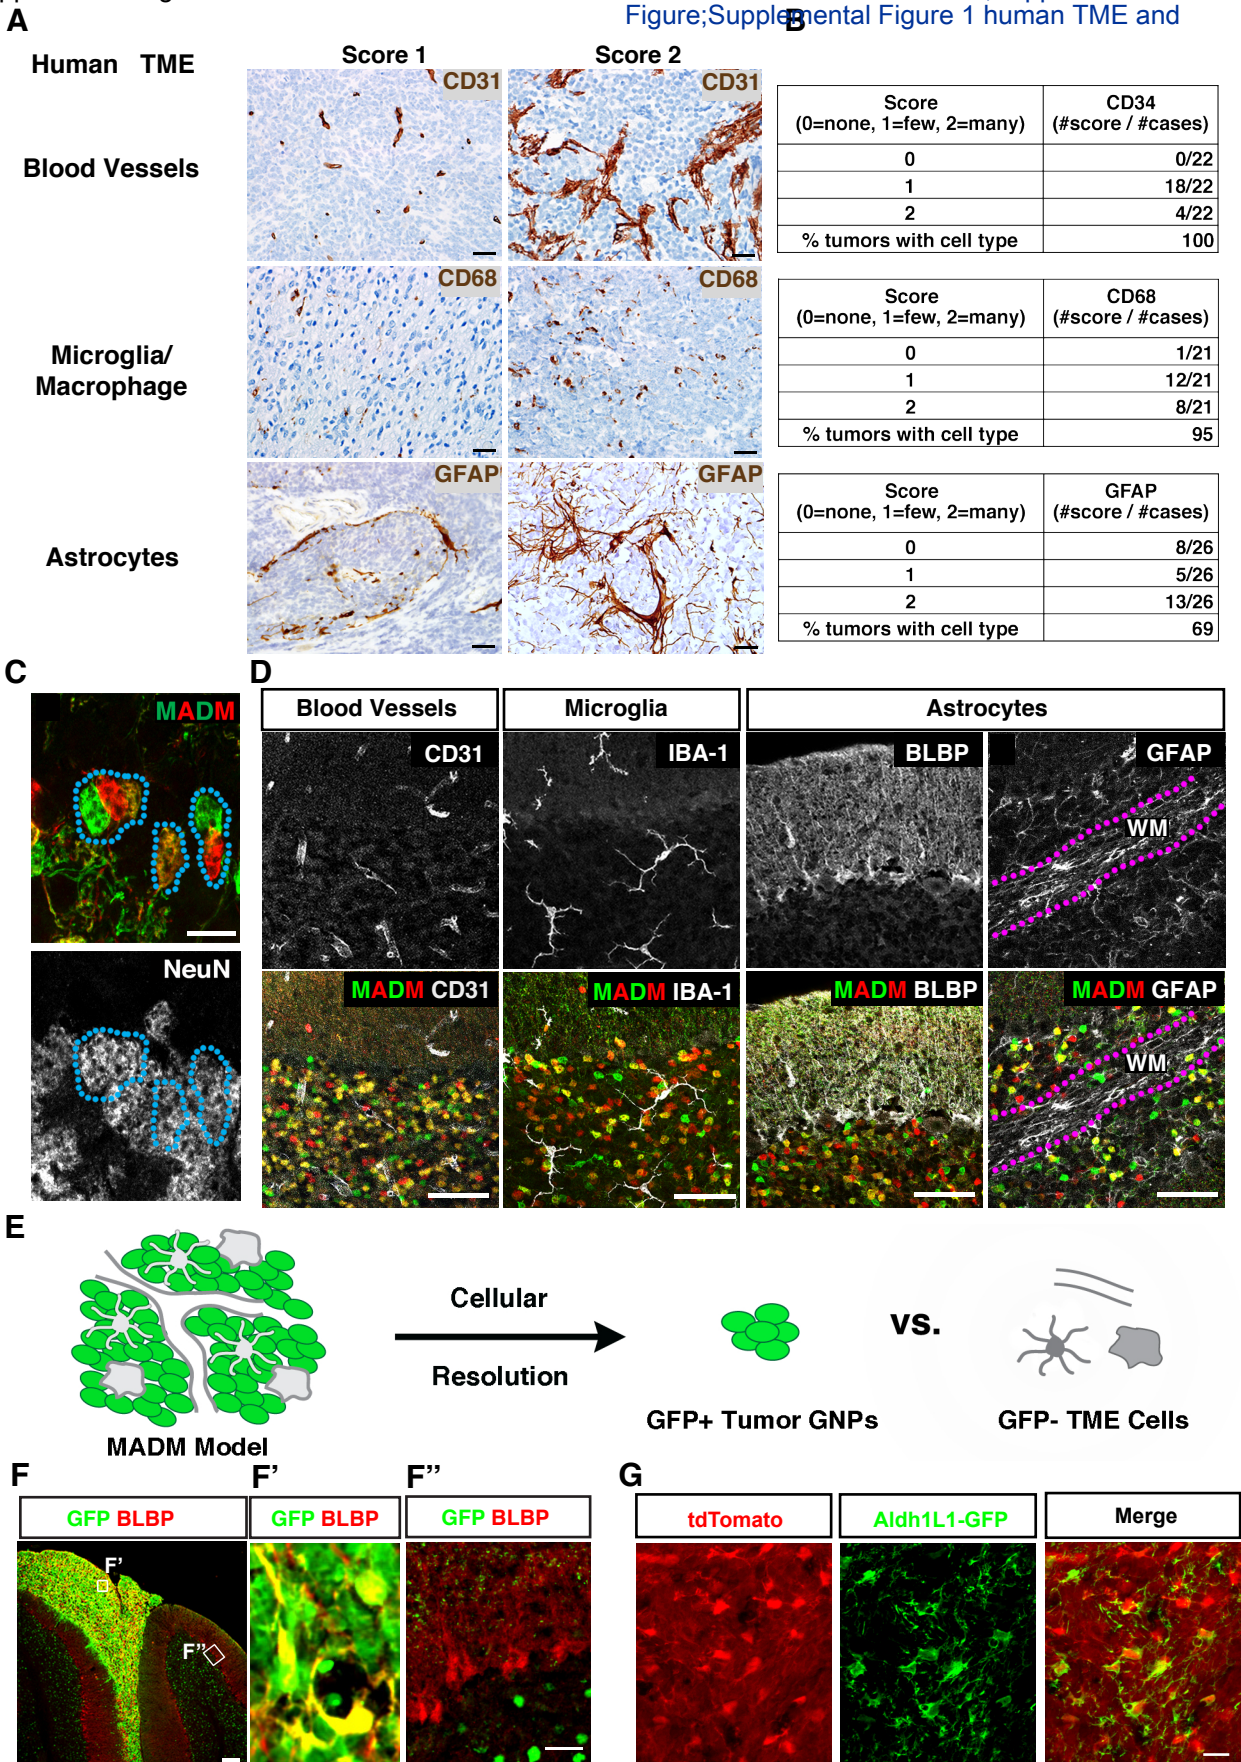

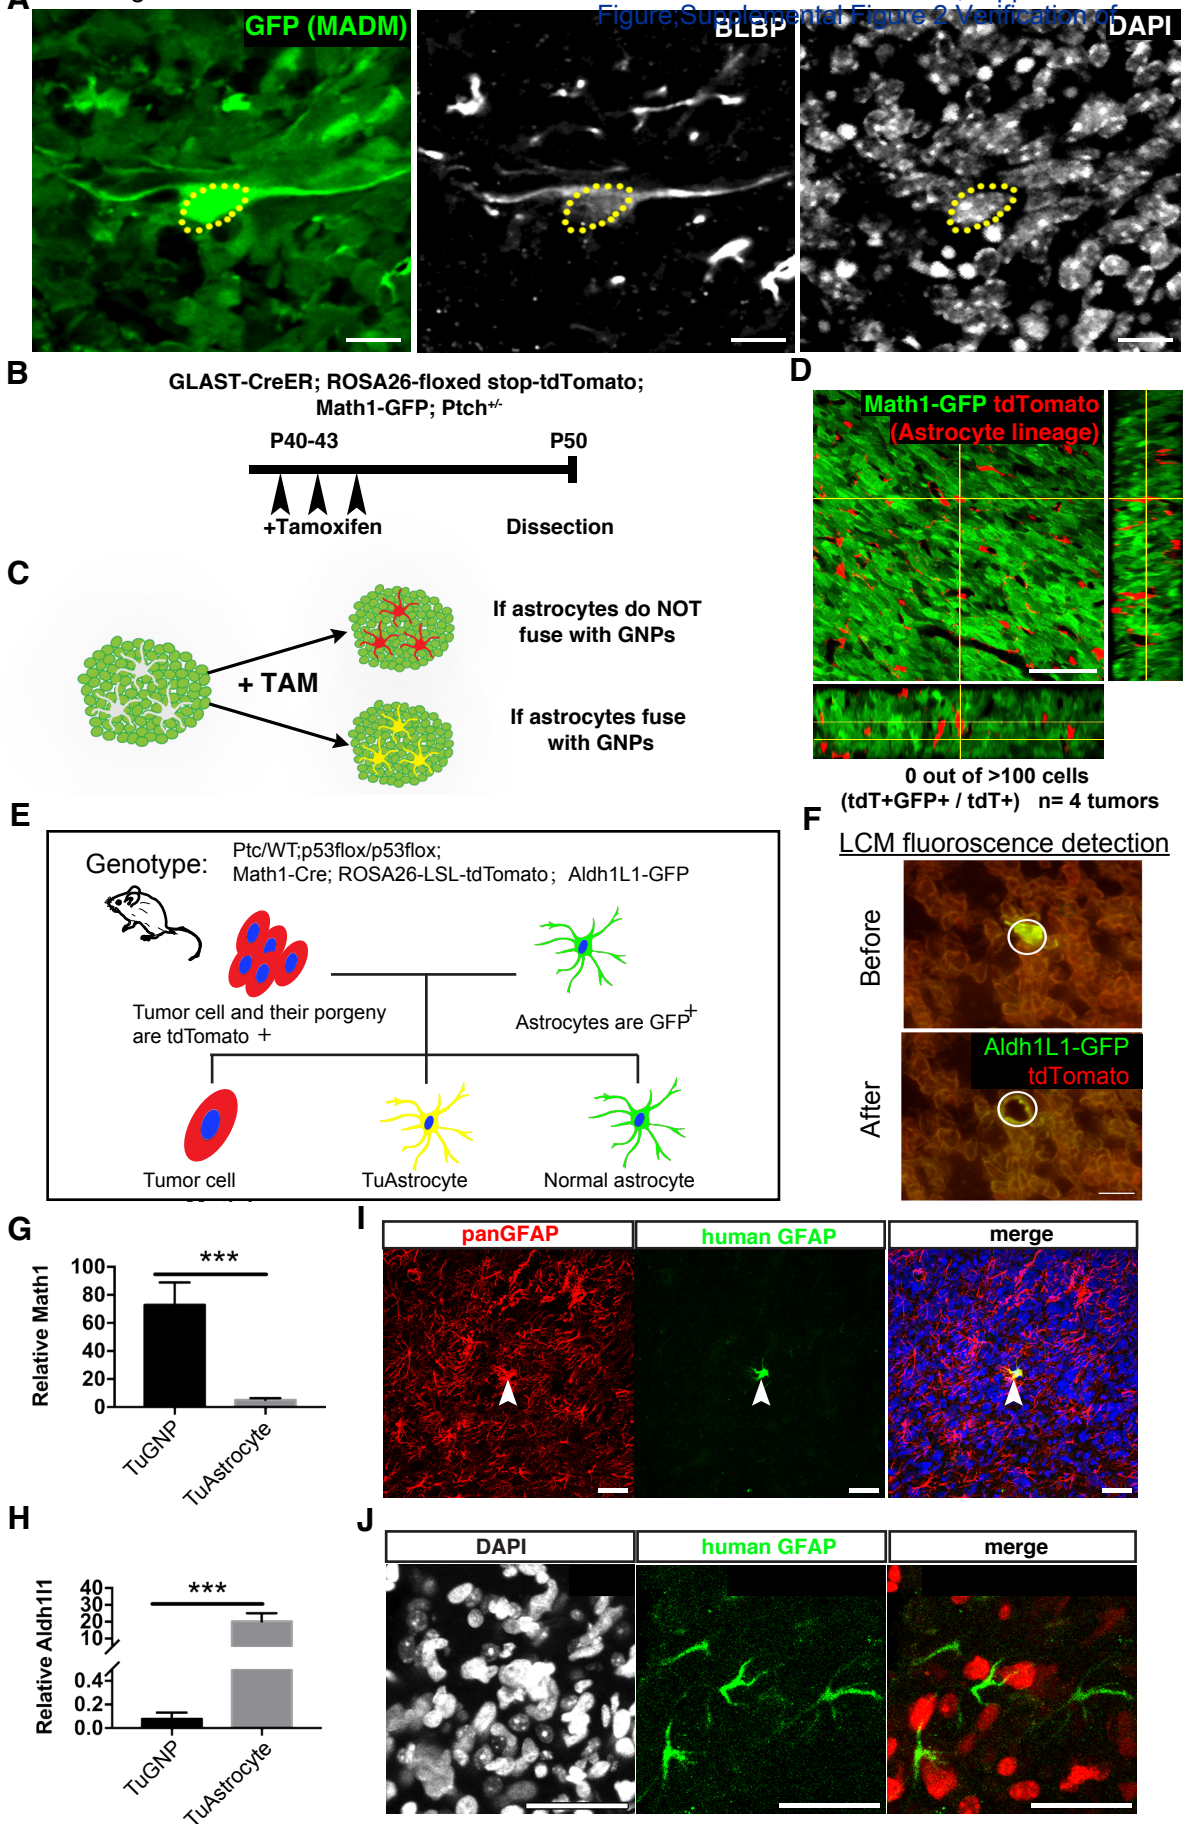



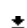**A**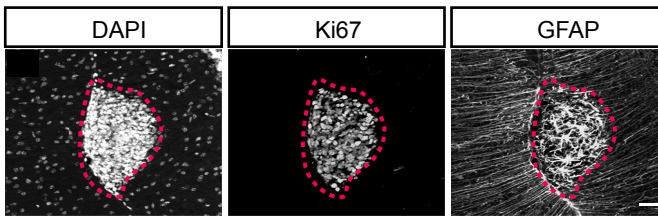**B**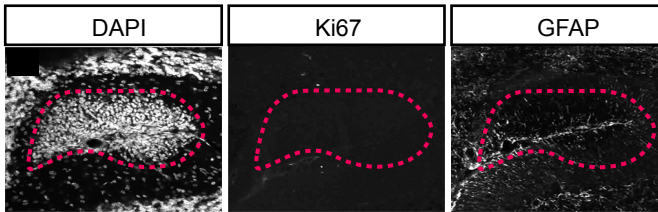**C**

|        | Ki67 + | Ki67 - |
|--------|--------|--------|
| GFAP + | 14     | 1      |
| GFAP - | 2      | 16     |

**D**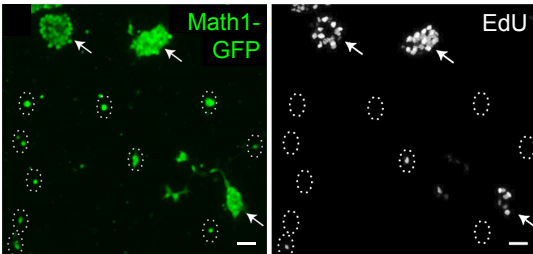**E**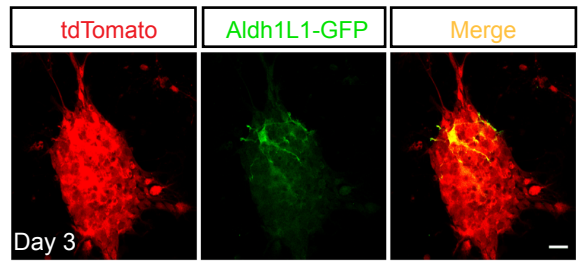**F**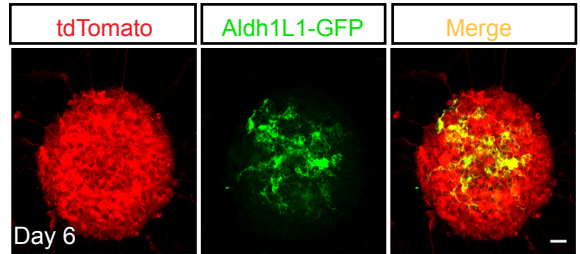**G**

|       | Spheres with<br>1 GFP+ cell | Spheres with<br>≥ 2 GFP+ cells | Total |
|-------|-----------------------------|--------------------------------|-------|
| Day 3 | 11%                         | 4.5%                           | 15.5% |
| Day 6 | 9%                          | 69%                            | 78%   |

S Fig. 3

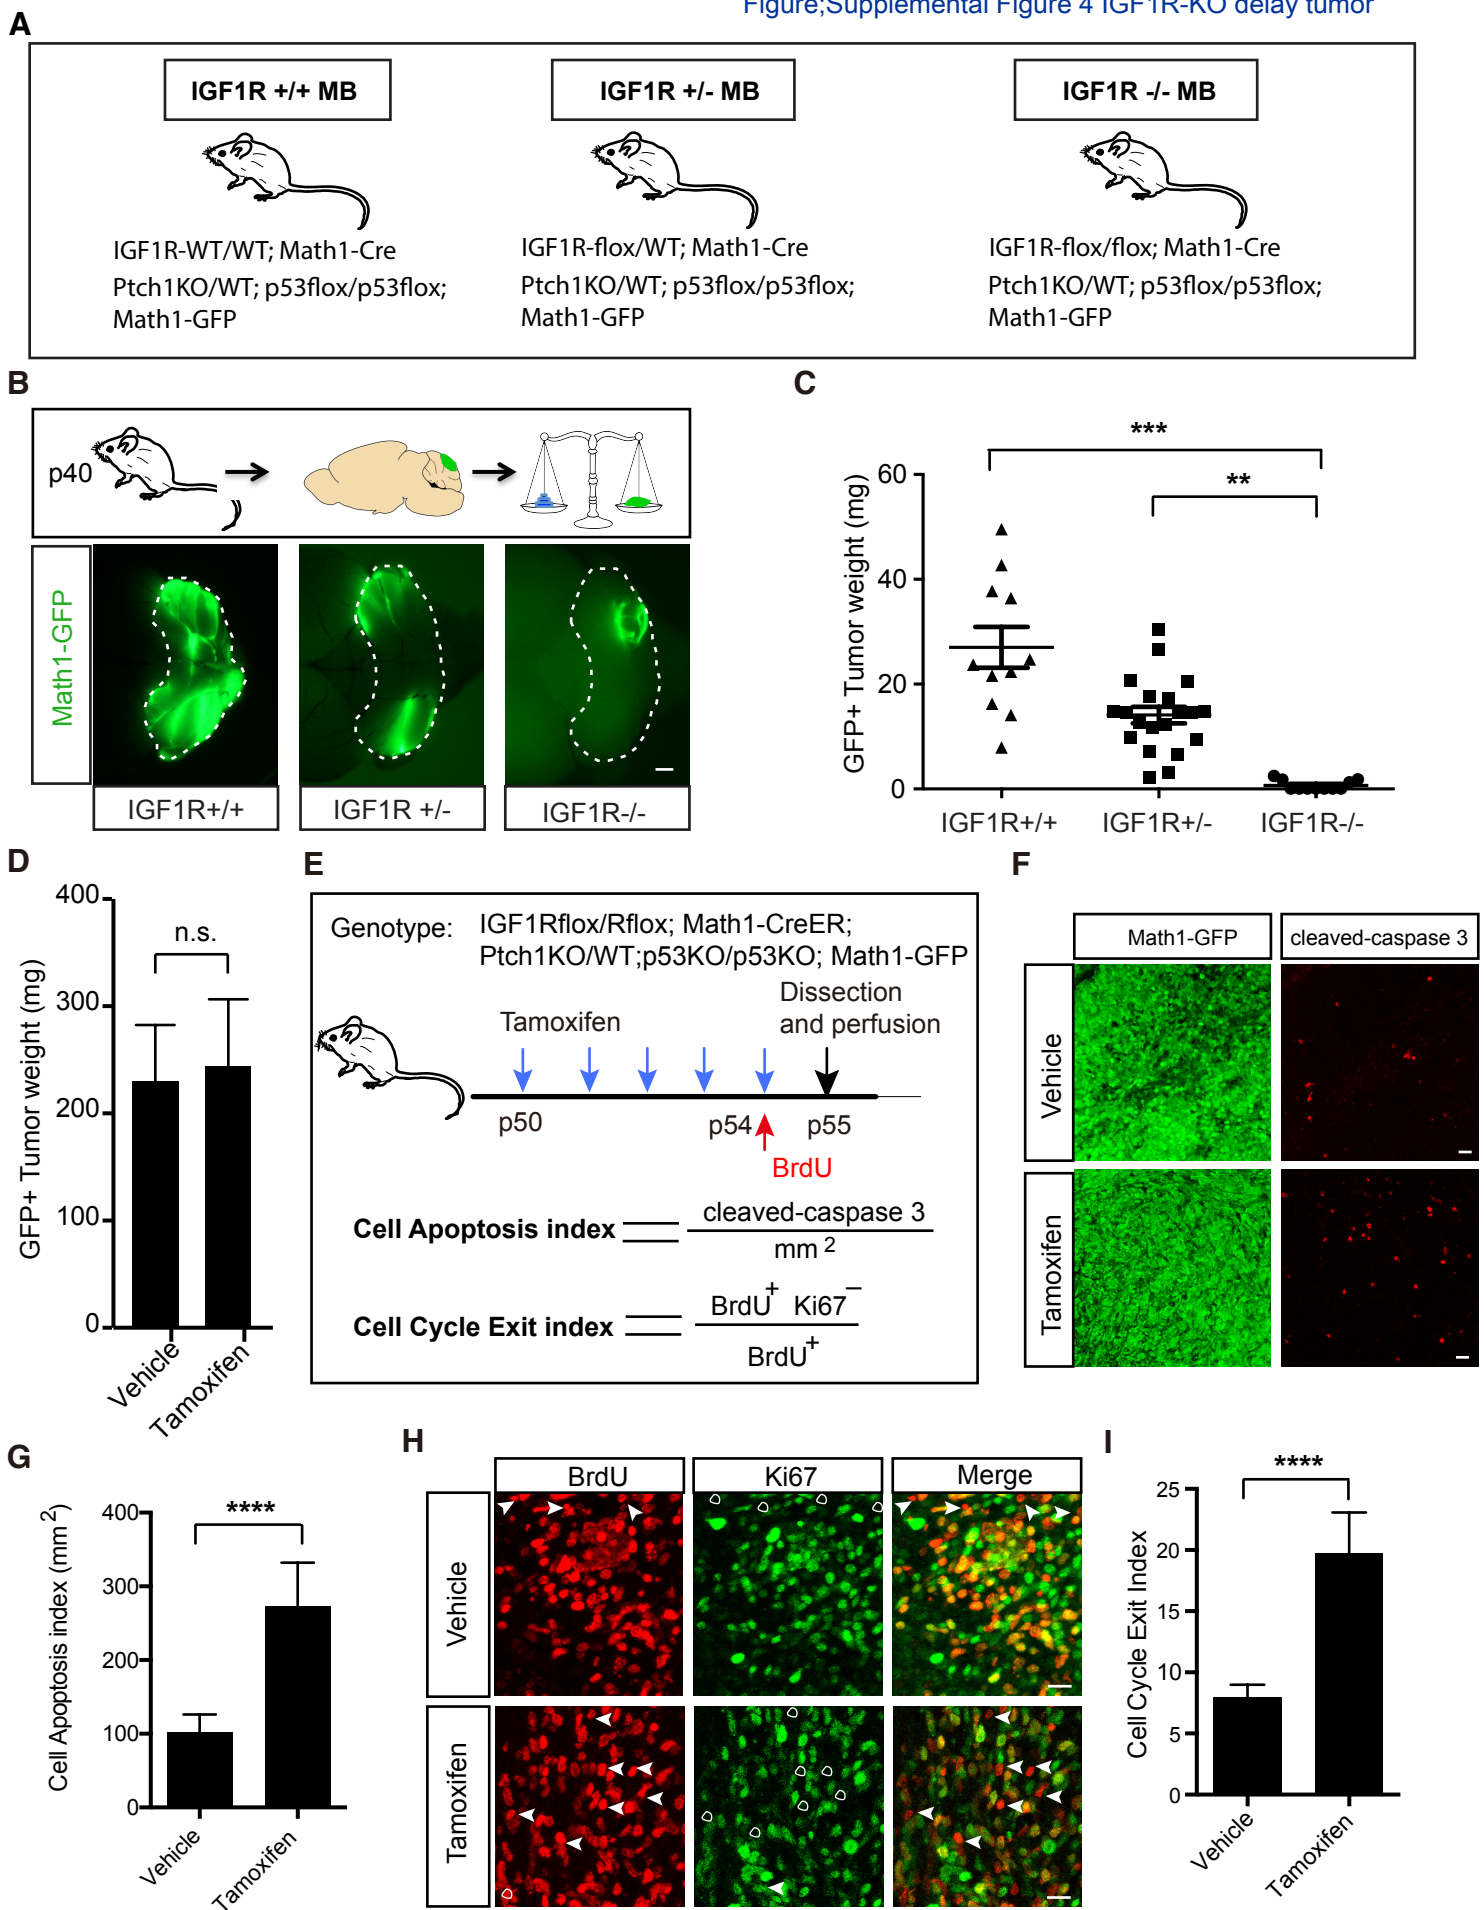



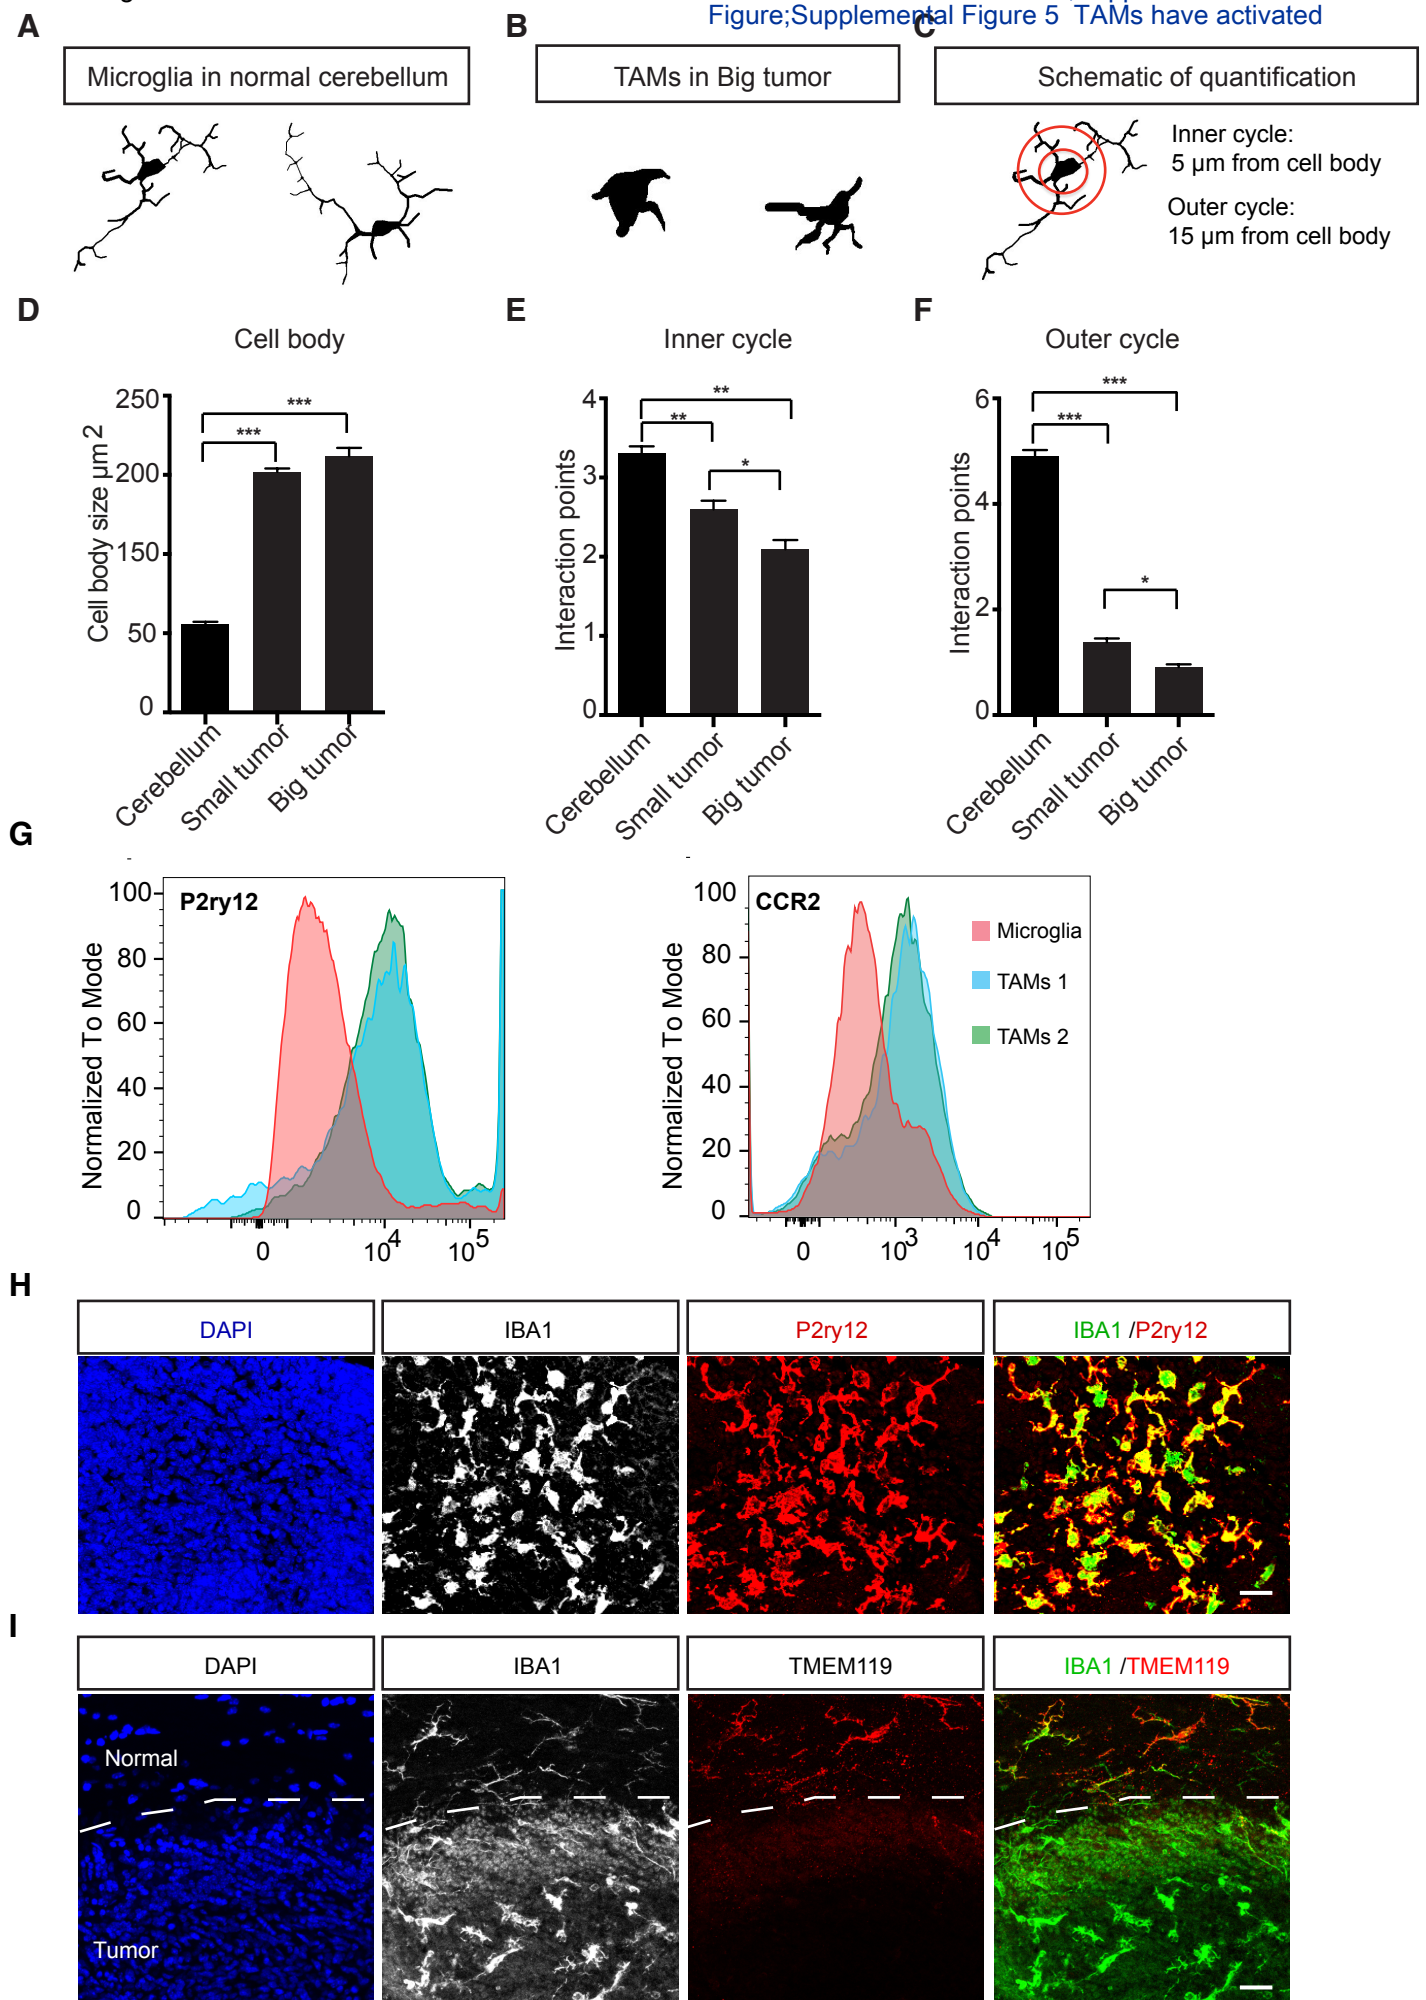

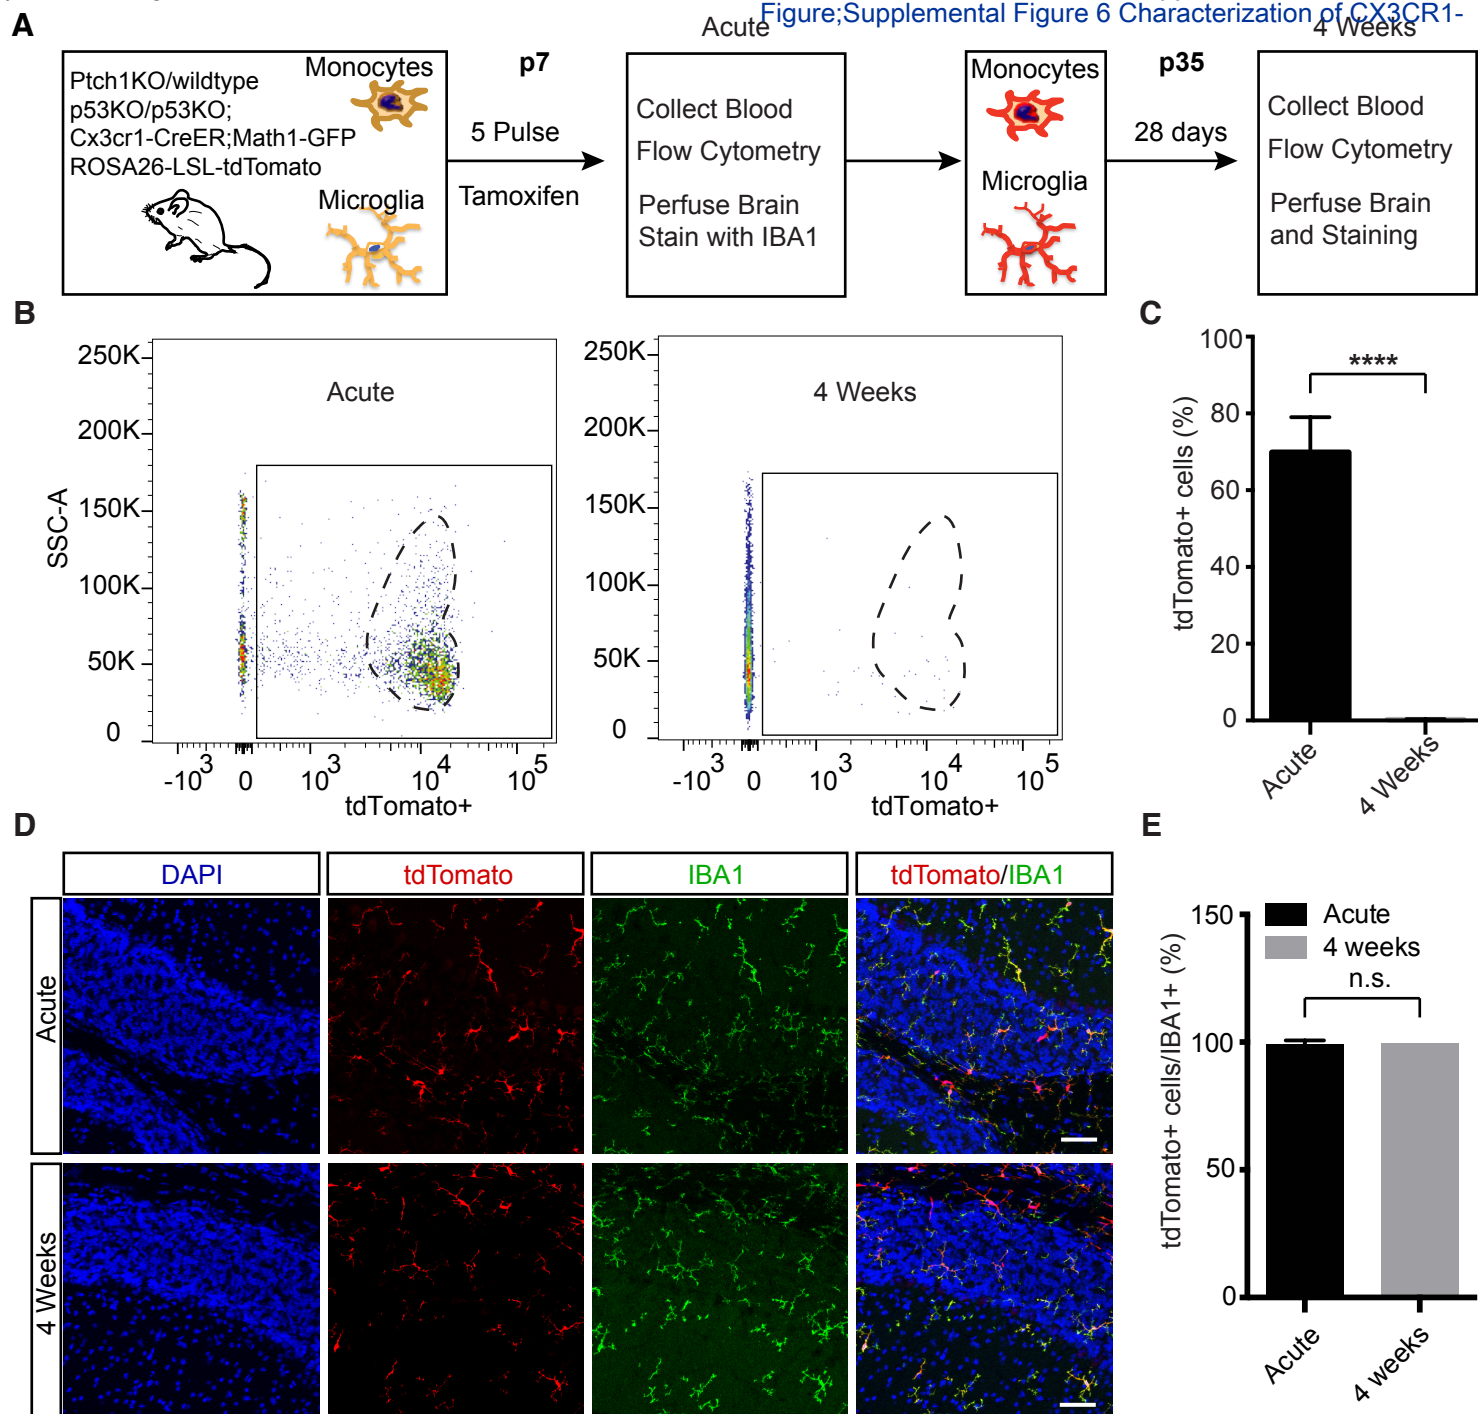

S Fig. 6



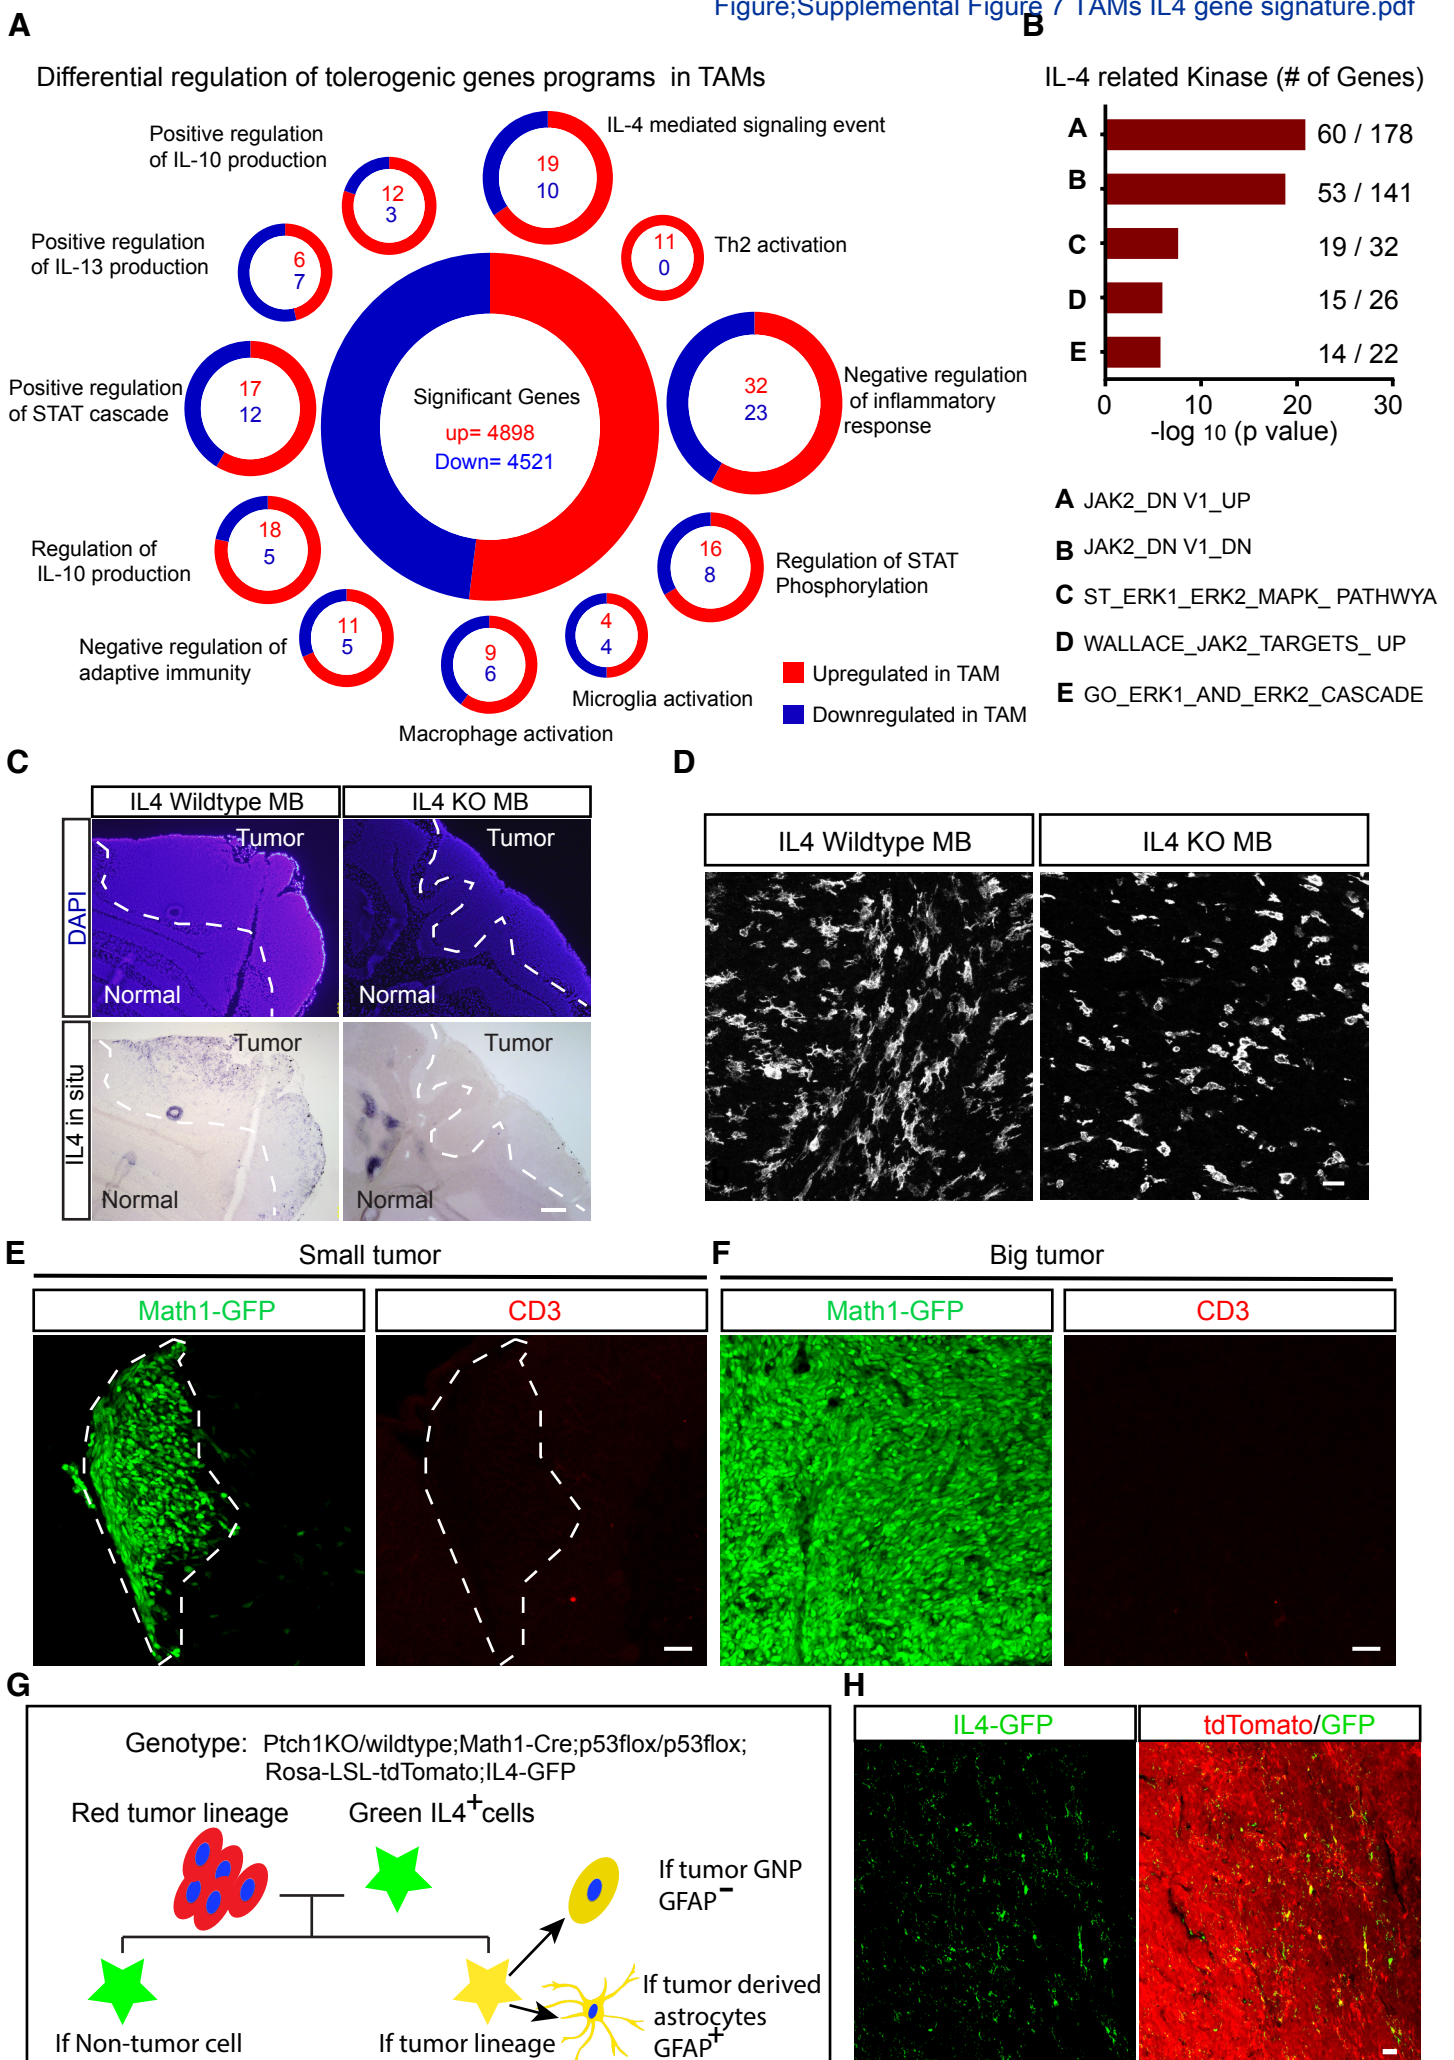

Supplement: NIHMS1582442-supplement-3.pdf [file NIHMS1582442-supplement-3.pdf]
